# Supplementary material for: Surface modification and intrinsic green fluorescence emission of a detonation nanodiamond
Source: Royal Society of Chemistry journal article supplement (doi:10.1039/c3tc31040j), 2013-01-01
Supplement: c3tc31040j.pdf [file c3tc31040j.pdf]

# Surface modification and intrinsic green fluorescent emission of detonation nanodiamond

Zhi-Min Wang, Cui-Lian Xu and Chao-Hui Liu

School of science, Henan Agricultural University, Zhengzhou 450002, People's Republic of China.

## Supplementary Information

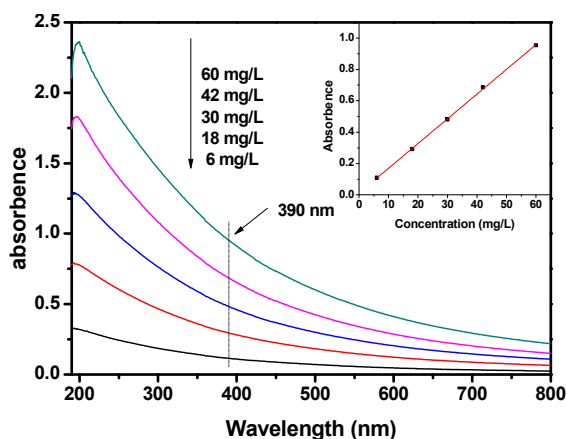

**Figure S1.** UV-vis absorption spectra of modified DND in water for different concentrations. Shown in the inset is Lambert-Beer's plot for the absorption at 390 nm.

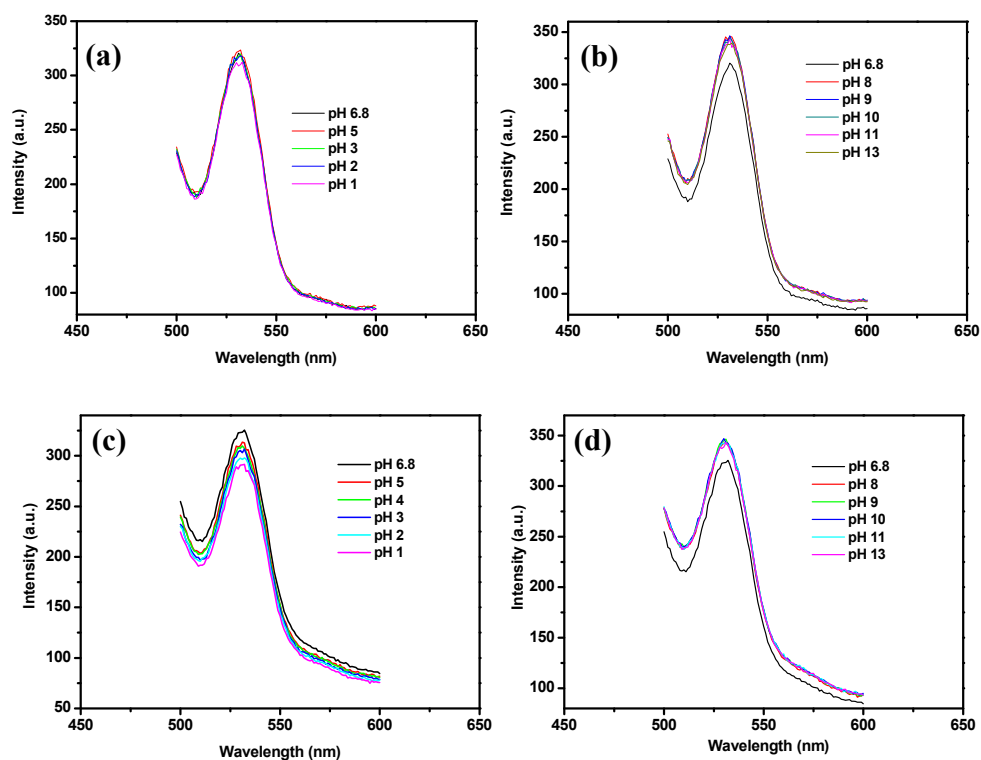

**Figure S2.** Effect of pH on the fluorescent properties of pristine (a and b) and modified DND (c and d) at the same concentration in water ( $0.3 \text{ mg mL}^{-1}$ ): (a) Effect of acidic pH on the fluorescent properties of pristine DND; (b) Effect of basic pH on the fluorescent properties of pristine DND; (c) Effect of acidic pH on the fluorescent properties of modified DND; (d) Effect of basic pH on the fluorescent properties of modified DND.

**Table S1.** Fluorescence quantum yields of pristine and modified DND

| sample          | Emission intensity ( $I$ ) | Abs at 390 nm ( $A$ ) | Refractive index of solvents ( $\eta$ ) | Quantum yield of ( $Q$ ) |
|-----------------|----------------------------|-----------------------|-----------------------------------------|--------------------------|
| quinine sulfate | 152.6                      | 0.036                 | 1.33                                    | 0.54 (known)             |
| Pristine DND    | 12.3                       | 0.116                 | 1.33                                    | 0.0135(calculated)       |
| Modified DND    | 13.5                       | 0.121                 | 1.33                                    | 0.0142(calculated)       |
